# Supplementary material
Source: ML conference proceedings conference paper supplement (https://openaccess.thecvf.com/content/CVPR_2019/html/Wang_Wide-Context_Semantic_Image_CVPR_2019_paper.html)
Supplement: Supplementary file 2 [file Wang_Wide-Context_Semantic_Image_CVPR_2019_supplemental.zip]

Archive with 1 entries (1 files):
- 0577-supp.pdf
